# Supplementary material
Source: ML conference proceedings conference paper supplement (https://openreview.net/forum?id=md9qolJwLl)
Supplement: supplementary_material [file attachment]

Table 4: Statistics of the used datasets, where density denotes the percentages of positive responses.

|                 | #objects | #attributes | density | object token          | attribute token       |
|-----------------|----------|-------------|---------|-----------------------|-----------------------|
| Region-language | 165      | 45          | 2.59    | single or multi-token | single-token          |
| Animal-behavior | 354      | 25          | 40.3    | single-token          | multi-token           |
| Disease-symptom | 122      | 33          | 6.76    | single-token          | single or multi-token |

## APPENDIX

## SUPPLEMENTAL RESULTS

**Computational resources** All experiments were conducted on machines equipped with 4 Nvidia A100 GPU. Our method do not require training of MLMs. The extraction of the formal contexts for our datasets is very fast ( $\leq 60$  seconds).

## PROOF OF LEMMAS

**Lemma 1** (feasibility). *Let  $\mathcal{D} = \{w^i\}_{i=1}^N$  be a dataset consisting of data points generated by Abstraction 1, then there exists an identification algorithm  $F : \mathcal{D} \rightarrow I$  such that  $F(\mathcal{D})$  converges to the ground-truth formal context  $I_0$  as  $N \rightarrow \infty$  almost surely, i.e.,  $F(\mathcal{D}) \rightarrow I \approx I_0$ .*

**Algorithm 1** A Formal Context Learning Algorithm

---

**Input:** A dataset  $\mathcal{D}$ , a set of objects  $G$  and attributes  $M$   
**Output:** An estimated formal context incidence matrix  $I = [0, 1]^{|G| \times |M|}$

initialize  $I = \mathbf{0}^{|G| \times |M|}$   
**for**  $w \in \mathcal{D}$  **do**  
  **for**  $w_i \in w$  **do**  
    **for**  $w_j \in w$  **do**  
      **if**  $w_i \in G, w_j \in M$  **then**  
         $I_{(G_{w_i}, M_{w_j})} = I_{(G_{w_i}, M_{w_j})} + 1$   
      **end if**  
    **end for**  
  **end for**  
**end for**  
normalization:  $I = \text{normalize}(I)$   
return  $I$

---

*Proof.* The algorithm 1 is constructed to derive a formal context  $I$  from  $\mathcal{D}$ . Our target is to demonstrate that  $I$  converges to  $I_0$  almost surely when the number of data points  $N \rightarrow \infty$ . Let  $\Omega$  denote the sample space,  $I_N$  represent the learned formal context from  $\mathcal{D}_N$ , and  $X_N = d(I_N, I_0)$  denote the random variable indexed by  $N$ . We need to establish that  $X_N \xrightarrow{\text{a.s.}} 0$ .

Let us define  $E_N := \{\omega \in \Omega : X_N(\omega) > \epsilon\}$  for  $\epsilon > 0$ , where  $\omega$  represents an element of the sample space. Let  $Y_{g,m,t} = \begin{cases} 1 & g, m \in x_t \\ 0 & \text{otherwise} \end{cases}$ , and

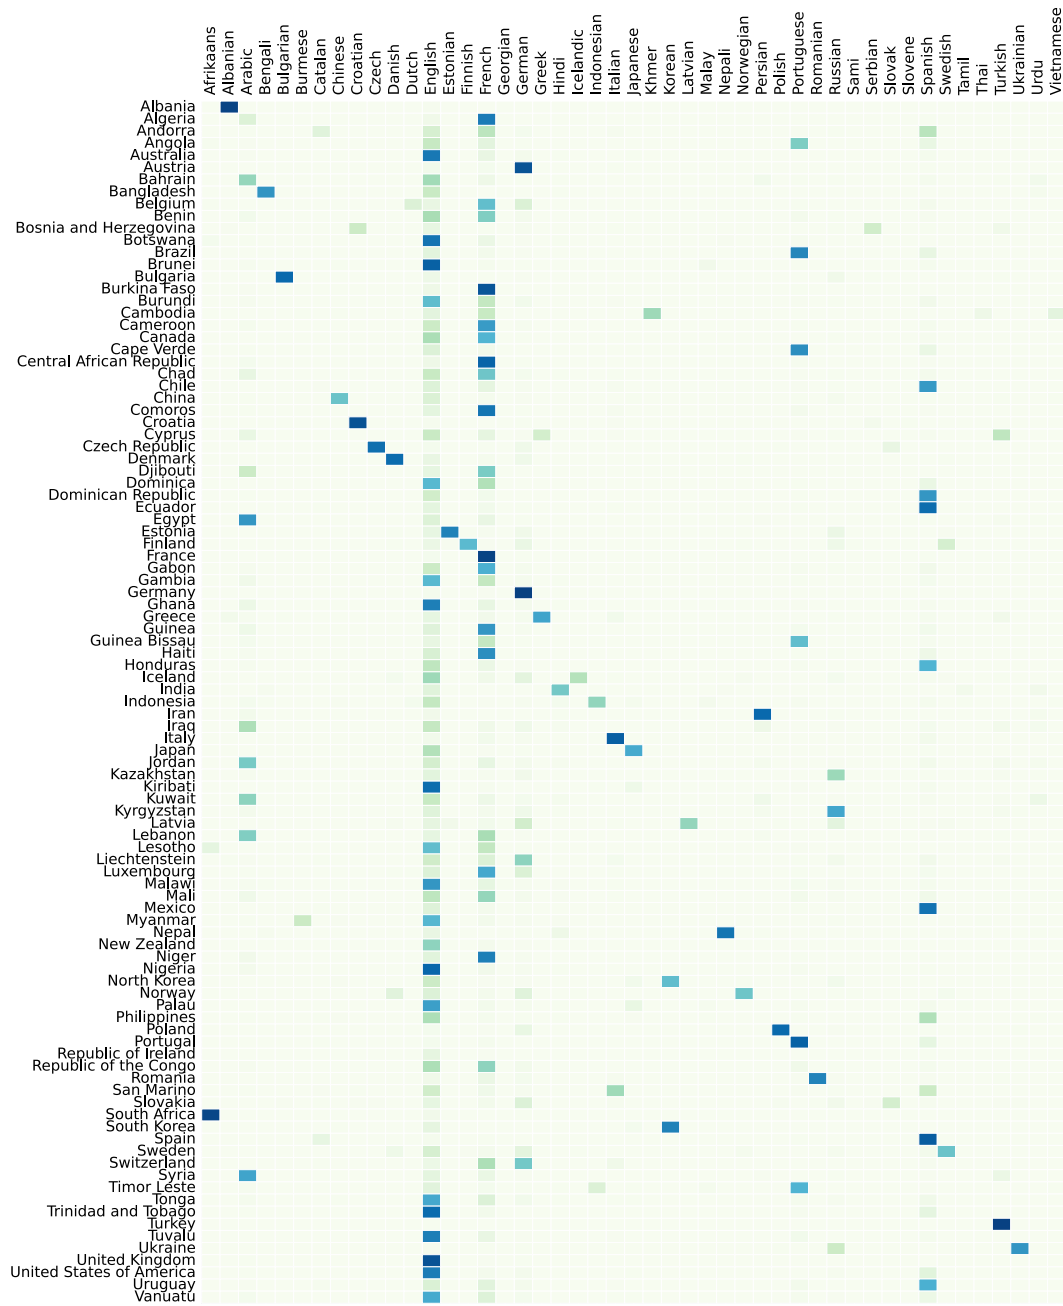

Figure 5: The normalized conditional probability of regions and their official language. The probability is generated by the cloze prompt "[object] is the official language of [attribute]".

$$\begin{aligned}
\text{consider } P(E_N) &= P\left(\sum_{g \in G, m \in M} \left| \frac{1}{N} \sum_{t=1}^N Y_{g,m,t} - I_{0g,m} \right| > \epsilon\right), \quad \text{we have} \\
P(E_N) &\stackrel{(a)}{\leq} P\left(\bigcup_{g \in G, m \in M} \left| \frac{1}{N} \sum_{t=1}^N Y_{g,m,t} - I_{0g,m} \right| > \frac{\epsilon}{q}\right) \\
&\stackrel{(b)}{\leq} \sum_{g \in G, m \in M} P\left(\left| \frac{1}{N} \sum_{t=1}^N Y_{g,m,t} - I_{0g,m} \right| > \frac{\epsilon}{q}\right) \\
&\stackrel{(c)}{\leq} 2q \exp\left(-\frac{2N\epsilon^2}{q^2}\right),
\end{aligned}$$

where inequalities (a) and (b) use the union bound, and (c) applies the Hoeffding's inequality.

By applying the Borel-Cantelli lemma, we have  $P(\limsup_{N \rightarrow \infty} E_N) = 0$ . Hence,  $P(\lim_{N \rightarrow \infty} X_N = 0) = 1$ . This means that  $I$  converges to  $I_0$  almost surely when  $N \rightarrow \infty$ .  $\square$

**Lemma 2** (role of pattern). *Let  $|\text{CMI}_{p_\theta}(g; m|b)|$  denote the conditional MI without latent variables and  $\text{CMI}_p(g; m|\mathbf{Z}; b)$  denote the conditional MI with latent variables  $\mathbf{Z}$ , we have  $|\text{CMI}_{p_\theta}(g; m|b)| - \text{CMI}_p(g; m|\mathbf{Z}; b) \leq 2H(\mathbf{Z}|b)$ , where  $H(\mathbf{Z}|b)$  is the conditional entropy.*

*Proof.* Proposition 3 from Zhang & Hashimoto (2021) shows that the dependency between two tokens can be captured by conditional MI. Our lemma can be proved in a similar way by viewing that the objects and attributes are all tokens in the vocabulary. That is  $g, m \in V$ .

Using the definition of conditional MI, we start with:

$$\text{CMI}_p(g; m|\mathbf{Z}; b) = \text{CMI}_p(g; m|b) - \text{CMI}_p(g; \mathbf{Z}|b) + \text{CMI}_p(g; \mathbf{Z}|m, b)$$

Expanding this, we get:

$$\begin{aligned}
\text{CMI}_p(g; m|\mathbf{Z}; b) &= \text{CMI}_p(g; m|b) + H(\mathbf{Z}|g, b) - H(\mathbf{Z}|b) \\
&\quad + H(\mathbf{Z}|m, b) - H(\mathbf{Z}|g, m, b).
\end{aligned}$$

Now, let's consider the difference:

$$\begin{aligned}
&|\text{CMI}_{p_\theta}(g; m|b)| - \text{CMI}_p(g; m|\mathbf{Z}; b) \\
&= \text{CMI}_p(g; m|b) - \text{CMI}_p(g; m|\mathbf{Z}; b) \\
&= -H(\mathbf{Z}|g, b) + H(\mathbf{Z}|b) - H(\mathbf{Z}|m, b) + H(\mathbf{Z}|g, m, b)
\end{aligned}$$

Next, apply the inequality properties of entropy:

$$\text{CMI}_p(g; m|b) - \text{CMI}_p(g; m|\mathbf{Z}; b) \leq H(\mathbf{Z}|b) + H(\mathbf{Z}|g, m, b)$$

Since entropy is always non-negative, we further have:

$$H(\mathbf{Z}|g, m, b) \leq H(\mathbf{Z}|b)$$

Combining these, we get:

$$\begin{aligned}
|\text{CMI}_{p_\theta}(g; m|b)| - \text{CMI}_p(g; m|\mathbf{Z}; b) &\leq H(\mathbf{Z}|b) + H(\mathbf{Z}|g, m, b) \\
&\leq 2H(\mathbf{Z}|b)
\end{aligned}$$

Therefore, we conclude that:

$$|\text{CMI}_{p_\theta}(g; m|b)| - \text{CMI}_p(g; m|\mathbf{Z}; b) \leq 2H(\mathbf{Z}|b).$$

This completes the proof.  $\square$
